# Supplementary material
Source: PubMed Central journal article supplement (PMC3666338)
Supplement: NIHMS458781-supplement-Supplement_Data.pdf [file NIHMS458781-supplement-Supplement_Data.pdf]

**Supplementary Figure S1. Distribution of family sizes in the GWAS sample.**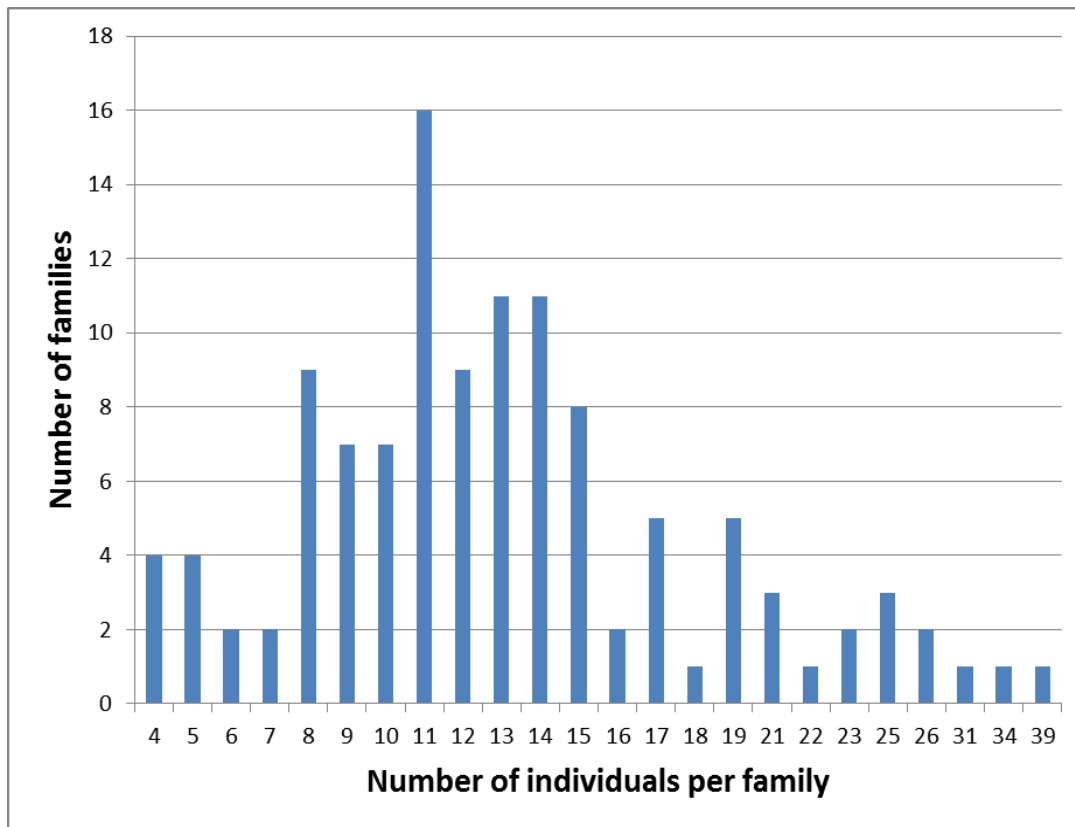

**Supplementary Figure S2. Headplot of placement of nineteen electrodes of 10-20 International System recording EEG/ERO activity from the surface of the scalp.** The frontal midline electrode (Fz) where theta ERO phenotype was recorded is highlighted in red, and the central midline (Cz) and parietal midline (Pz) electrodes where theta EROs were recorded for secondary analysis are highlighted in blue.

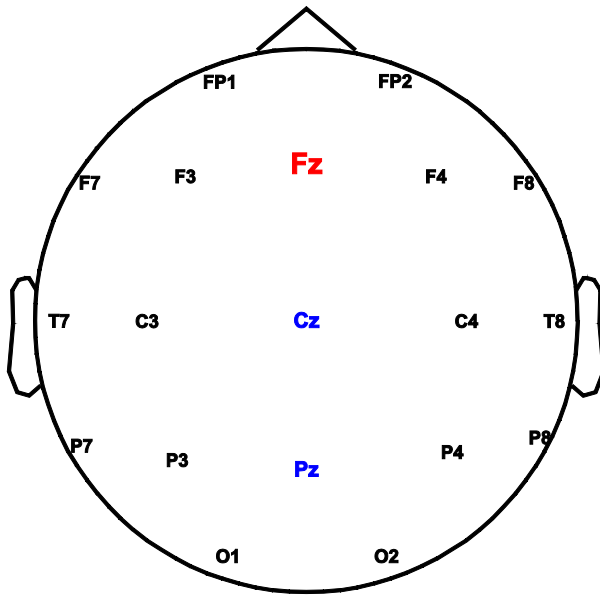

**Supplementary Figure S3. Quantile-Quantile plot of GWAS results for theta power at Fz.**  
The genomic control inflation factor  $\lambda$  is 1.00.

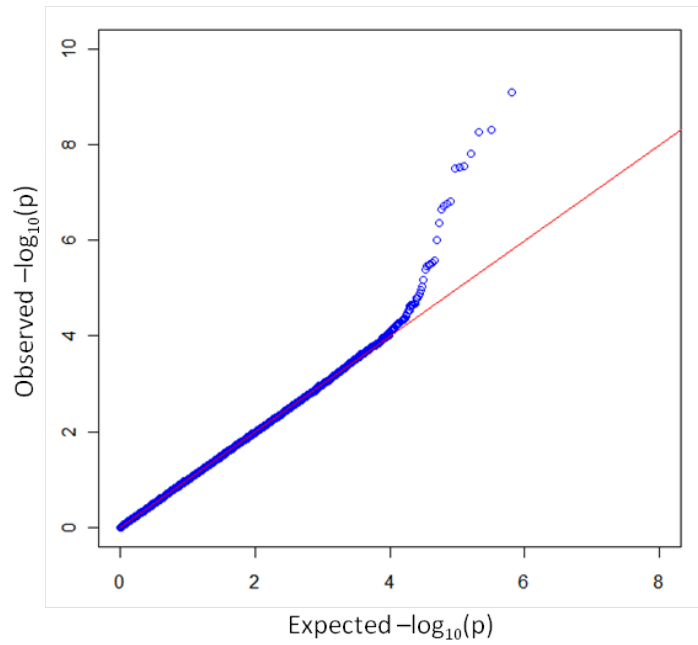

**Supplementary Table S1. Imputed SNPs in *KCNJ6* with  $p < 1 \times 10^{-5}$  associated with theta power at Fz.**

| SNP         | BP         | A1 | A2 | Freq1 | Effect | P                      |
|-------------|------------|----|----|-------|--------|------------------------|
| rs2835880   | 39,032,477 | A  | G  | 0.68  | -0.148 | $2.80 \times 10^{-10}$ |
| rs2835872   | 39,027,272 | G  | A  | 0.681 | -0.145 | $4.70 \times 10^{-10}$ |
| rs10483038  | 39,024,771 | T  | C  | 0.681 | -0.144 | $6.60 \times 10^{-10}$ |
| rs73222345  | 39,036,569 | G  | A  | 0.646 | -0.140 | $1.40 \times 10^{-9}$  |
| rs857976    | 39,001,177 | A  | C  | 0.696 | -0.140 | $2.30 \times 10^{-9}$  |
| rs857947    | 39,008,539 | T  | C  | 0.699 | -0.139 | $3.10 \times 10^{-9}$  |
| rs702860    | 39,008,629 | T  | C  | 0.699 | -0.139 | $3.10 \times 10^{-9}$  |
| rs857946    | 39,009,303 | T  | A  | 0.699 | -0.139 | $3.10 \times 10^{-9}$  |
| rs2835848   | 39,011,073 | C  | T  | 0.699 | -0.139 | $3.10 \times 10^{-9}$  |
| rs2835849   | 39,011,524 | T  | C  | 0.699 | -0.139 | $3.10 \times 10^{-9}$  |
| rs73222307  | 39,012,225 | G  | A  | 0.699 | -0.139 | $3.10 \times 10^{-9}$  |
| rs717859    | 39,012,802 | G  | A  | 0.699 | -0.139 | $3.10 \times 10^{-9}$  |
| rs73222309  | 39,013,686 | C  | T  | 0.699 | -0.139 | $3.10 \times 10^{-9}$  |
| rs2835852   | 39,014,128 | G  | A  | 0.699 | -0.139 | $3.10 \times 10^{-9}$  |
| rs73222314  | 39,014,802 | A  | G  | 0.699 | -0.139 | $3.10 \times 10^{-9}$  |
| rs2835853   | 39,014,892 | C  | A  | 0.699 | -0.139 | $3.10 \times 10^{-9}$  |
| rs2835855   | 39,015,754 | T  | A  | 0.699 | -0.139 | $3.10 \times 10^{-9}$  |
| rs1475839   | 39,021,941 | C  | T  | 0.692 | -0.141 | $3.10 \times 10^{-9}$  |
| rs2835850   | 39,012,977 | T  | C  | 0.699 | -0.139 | $3.50 \times 10^{-9}$  |
| rs111372083 | 39,010,676 | C  | T  | 0.699 | -0.138 | $3.70 \times 10^{-9}$  |
| rs857973    | 39,007,498 | G  | A  | 0.697 | -0.137 | $5.50 \times 10^{-9}$  |

|            |            |   |   |       |        |                       |
|------------|------------|---|---|-------|--------|-----------------------|
| rs721014   | 39,008,109 | G | A | 0.697 | -0.137 | $5.60 \times 10^{-9}$ |
| rs2154553  | 39,004,501 | A | G | 0.696 | -0.136 | $6.70 \times 10^{-9}$ |
| rs857974   | 39,005,741 | G | A | 0.696 | -0.136 | $6.70 \times 10^{-9}$ |
| rs17814920 | 39,015,897 | G | A | 0.697 | -0.137 | $6.80 \times 10^{-9}$ |
| rs66815183 | 39,032,828 | C | T | 0.703 | -0.142 | $7.20 \times 10^{-9}$ |
| rs1515050  | 39,003,142 | C | T | 0.696 | -0.135 | $8.00 \times 10^{-9}$ |
| rs1787331  | 39,003,525 | G | T | 0.696 | -0.135 | $8.00 \times 10^{-9}$ |
| rs857975   | 39,001,613 | G | T | 0.696 | -0.135 | $8.30 \times 10^{-9}$ |
| rs1787330  | 39,002,787 | A | G | 0.696 | -0.135 | $8.30 \times 10^{-9}$ |
| rs702859   | 38,997,701 | A | G | 0.679 | -0.130 | $1.60 \times 10^{-8}$ |
| rs857979   | 38,998,093 | G | A | 0.679 | -0.130 | $1.60 \times 10^{-8}$ |
| rs2835838  | 38,990,994 | A | G | 0.678 | -0.129 | $1.70 \times 10^{-8}$ |
| rs2835839  | 38,991,034 | T | C | 0.678 | -0.129 | $1.70 \times 10^{-8}$ |
| rs2835840  | 38,991,321 | G | C | 0.678 | -0.129 | $1.70 \times 10^{-8}$ |
| rs857980   | 38,995,142 | A | G | 0.678 | -0.130 | $1.70 \times 10^{-8}$ |
| rs702858   | 38,995,169 | G | A | 0.678 | -0.130 | $1.70 \times 10^{-8}$ |
| rs73220488 | 38,987,025 | C | T | 0.684 | -0.130 | $1.80 \times 10^{-8}$ |
| rs2835831  | 38,987,233 | T | C | 0.684 | -0.130 | $1.80 \times 10^{-8}$ |
| rs73220491 | 38,988,323 | T | G | 0.683 | -0.129 | $1.80 \times 10^{-8}$ |
| rs4816568  | 38,988,346 | A | G | 0.683 | -0.129 | $1.80 \times 10^{-8}$ |
| rs2835836  | 38,989,187 | A | C | 0.683 | -0.130 | $1.80 \times 10^{-8}$ |
| rs75938265 | 38,987,039 | C | T | 0.683 | -0.129 | $1.90 \times 10^{-8}$ |
| rs2835833  | 38,987,897 | G | A | 0.683 | -0.129 | $2.00 \times 10^{-8}$ |
| rs4816567  | 38,988,155 | T | C | 0.683 | -0.129 | $2.00 \times 10^{-8}$ |

|             |            |   |   |       |        |                       |
|-------------|------------|---|---|-------|--------|-----------------------|
| rs4817877   | 38,988,393 | G | C | 0.683 | -0.129 | $2.00 \times 10^{-8}$ |
| rs2835835   | 38,989,072 | G | A | 0.682 | -0.129 | $2.10 \times 10^{-8}$ |
| rs2835837   | 38,990,443 | G | A | 0.681 | -0.129 | $2.10 \times 10^{-8}$ |
| rs857978    | 38,998,126 | G | A | 0.678 | -0.128 | $2.20 \times 10^{-8}$ |
| rs3827195   | 39,049,817 | C | T | 0.665 | -0.130 | $2.70 \times 10^{-8}$ |
| rs73220495  | 38,989,712 | G | A | 0.681 | -0.128 | $2.80 \times 10^{-8}$ |
| rs73220494  | 38,989,276 | C | T | 0.680 | -0.127 | $2.90 \times 10^{-8}$ |
| rs111576572 | 38,989,564 | A | G | 0.680 | -0.127 | $2.90 \times 10^{-8}$ |
| rs67739865  | 39,049,101 | G | A | 0.665 | -0.129 | $3.30 \times 10^{-8}$ |
| rs1787402   | 39,038,990 | T | C | 0.6   | -0.123 | $4.00 \times 10^{-8}$ |
| rs8126563   | 39,052,624 | C | T | 0.665 | -0.128 | $4.00 \times 10^{-8}$ |
| rs2835893   | 39,060,893 | G | A | 0.672 | -0.126 | $6.10 \times 10^{-8}$ |
| rs2835894   | 39,066,042 | A | G | 0.671 | -0.126 | $7.00 \times 10^{-8}$ |
| rs1787406   | 39,051,168 | A | C | 0.504 | 0.119  | $7.40 \times 10^{-8}$ |
| rs2835895   | 39,066,353 | C | T | 0.671 | -0.126 | $7.50 \times 10^{-8}$ |
| rs2835896   | 39,066,640 | C | T | 0.671 | -0.126 | $7.50 \times 10^{-8}$ |
| rs1709826   | 39,049,473 | A | G | 0.505 | 0.119  | $8.50 \times 10^{-8}$ |
| rs2835888   | 39,049,859 | T | C | 0.535 | 0.119  | $8.70 \times 10^{-8}$ |
| rs1399590   | 39,054,071 | A | G | 0.503 | 0.119  | $9.00 \times 10^{-8}$ |
| rs1399591   | 39,053,957 | T | C | 0.504 | 0.118  | $1.00 \times 10^{-7}$ |
| rs4452239   | 39,052,655 | G | T | 0.503 | 0.118  | $1.10 \times 10^{-7}$ |
| rs4477996   | 39,052,666 | T | C | 0.503 | 0.118  | $1.10 \times 10^{-7}$ |
| rs2835900   | 39,075,749 | G | T | 0.671 | -0.123 | $1.10 \times 10^{-7}$ |
| rs12482570  | 39,077,777 | A | G | 0.671 | -0.123 | $1.10 \times 10^{-7}$ |

|            |            |   |   |       |        |                       |
|------------|------------|---|---|-------|--------|-----------------------|
| rs2835910  | 39,085,907 | C | T | 0.67  | -0.122 | $1.10 \times 10^{-7}$ |
| rs1515056  | 39,082,585 | C | G | 0.671 | -0.122 | $1.20 \times 10^{-7}$ |
| rs1399592  | 39,053,862 | T | G | 0.534 | 0.117  | $1.30 \times 10^{-7}$ |
| rs1888467  | 39,052,780 | G | T | 0.534 | 0.117  | $1.40 \times 10^{-7}$ |
| rs724545   | 39,052,878 | G | T | 0.534 | 0.117  | $1.40 \times 10^{-7}$ |
| rs62221645 | 39,071,226 | T | C | 0.671 | -0.123 | $1.40 \times 10^{-7}$ |
| rs2835898  | 39,071,781 | T | C | 0.671 | -0.123 | $1.40 \times 10^{-7}$ |
| rs7278101  | 39,035,873 | T | C | 0.594 | -0.111 | $6.60 \times 10^{-7}$ |
| rs4817881  | 39,031,902 | C | T | 0.516 | 0.109  | $7.90 \times 10^{-7}$ |
| rs1709819  | 39,036,115 | C | A | 0.565 | -0.108 | $8.60 \times 10^{-7}$ |
| rs8134288  | 39,036,989 | C | T | 0.563 | -0.108 | $8.60 \times 10^{-7}$ |
| rs1787397  | 39,037,378 | G | A | 0.563 | -0.108 | $8.60 \times 10^{-7}$ |
| rs1787398  | 39,037,504 | C | A | 0.563 | -0.108 | $8.60 \times 10^{-7}$ |
| rs1709835  | 39,037,636 | G | A | 0.563 | -0.108 | $8.60 \times 10^{-7}$ |
| rs1709833  | 39,037,805 | G | A | 0.563 | -0.108 | $8.60 \times 10^{-7}$ |
| rs1787399  | 39,037,883 | G | A | 0.563 | -0.108 | $8.60 \times 10^{-7}$ |
| rs1709832  | 39,038,167 | G | T | 0.563 | -0.108 | $8.60 \times 10^{-7}$ |
| rs1787400  | 39,038,217 | C | G | 0.563 | -0.108 | $8.60 \times 10^{-7}$ |
| rs1787401  | 39,038,893 | T | C | 0.563 | -0.108 | $8.60 \times 10^{-7}$ |
| rs1709820  | 39,035,971 | C | A | 0.563 | -0.108 | $8.70 \times 10^{-7}$ |
| rs1787394  | 39,036,176 | A | C | 0.563 | -0.108 | $8.70 \times 10^{-7}$ |
| rs1709818  | 39,036,211 | C | T | 0.563 | -0.108 | $8.70 \times 10^{-7}$ |
| rs1709817  | 39,036,349 | A | T | 0.563 | -0.108 | $8.70 \times 10^{-7}$ |
| rs1787395  | 39,036,478 | C | A | 0.563 | -0.108 | $8.70 \times 10^{-7}$ |

|            |            |   |   |       |        |                       |
|------------|------------|---|---|-------|--------|-----------------------|
| rs1787396  | 39,036,487 | C | A | 0.563 | -0.108 | $8.70 \times 10^{-7}$ |
| rs1787404  | 39,049,362 | G | A | 0.622 | -0.111 | $9.30 \times 10^{-7}$ |
| rs2835881  | 39,033,131 | G | A | 0.548 | 0.109  | $9.80 \times 10^{-7}$ |
| rs1787393  | 39,035,934 | A | G | 0.563 | -0.106 | $1.30 \times 10^{-6}$ |
| rs2850123  | 39,034,762 | C | T | 0.567 | -0.107 | $1.40 \times 10^{-6}$ |
| rs1709822  | 39,035,485 | G | A | 0.564 | -0.106 | $1.50 \times 10^{-6}$ |
| rs1709821  | 39,035,622 | C | T | 0.564 | -0.106 | $1.50 \times 10^{-6}$ |
| rs8133572  | 39,041,923 | C | G | 0.589 | 0.105  | $2.20 \times 10^{-6}$ |
| rs4816576  | 39,042,259 | G | A | 0.589 | 0.105  | $2.20 \times 10^{-6}$ |
| rs11700477 | 39,043,011 | C | G | 0.584 | 0.103  | $3.90 \times 10^{-6}$ |
| rs858008   | 39,065,630 | G | A | 0.512 | 0.099  | $4.30 \times 10^{-6}$ |
| rs2835903  | 39,077,237 | G | C | 0.546 | 0.101  | $4.30 \times 10^{-6}$ |
| rs1787423  | 39,016,910 | G | C | 0.509 | -0.101 | $4.50 \times 10^{-6}$ |
| rs2835886  | 39,040,342 | C | T | 0.586 | 0.101  | $4.50 \times 10^{-6}$ |
| rs2835887  | 39,040,359 | T | C | 0.586 | 0.101  | $4.50 \times 10^{-6}$ |
| rs1008542  | 39,040,561 | G | A | 0.586 | 0.101  | $4.50 \times 10^{-6}$ |
| rs1008543  | 39,040,776 | G | A | 0.586 | 0.101  | $4.50 \times 10^{-6}$ |
| rs1008544  | 39,040,869 | T | C | 0.586 | 0.101  | $4.50 \times 10^{-6}$ |
| rs9982323  | 39,041,628 | G | A | 0.586 | 0.101  | $4.50 \times 10^{-6}$ |
| rs8134478  | 39,041,817 | T | G | 0.586 | 0.101  | $4.50 \times 10^{-6}$ |
| rs2835901  | 39,076,914 | C | T | 0.545 | 0.100  | $4.60 \times 10^{-6}$ |
| rs12233305 | 39,046,853 | C | A | 0.588 | 0.103  | $5.20 \times 10^{-6}$ |
| rs1005546  | 39,068,872 | G | A | 0.545 | 0.100  | $5.20 \times 10^{-6}$ |
| rs1005545  | 39,069,197 | C | G | 0.545 | 0.100  | $5.50 \times 10^{-6}$ |



|           |            |   |   |       |        |                       |
|-----------|------------|---|---|-------|--------|-----------------------|
| rs2673014 | 39,034,789 | G | A | 0.575 | -0.102 | $5.60 \times 10^{-6}$ |
| rs2835899 | 39,075,494 | A | T | 0.544 | 0.100  | $5.60 \times 10^{-6}$ |
| rs2835906 | 39,082,804 | T | C | 0.591 | 0.098  | $7.70 \times 10^{-6}$ |

<sup>a</sup> A1 is the reference allele.

<sup>b</sup> Freq. is the allele frequency of the reference allele A1.

<sup>c</sup> Effect is the effect of the reference allele A1 on the phenotype theta power recorded at Fz.

**Supplementary Table S2. SNPs in *CHRM2* and *GRM8* with  $p < 0.05$  associated with theta power at Fz.**

| chr | gene  | function | SNP        | BP          | A1 <sup>a</sup> | A2 | Freq <sup>b</sup> | Effect <sup>c</sup> | $p$                   |
|-----|-------|----------|------------|-------------|-----------------|----|-------------------|---------------------|-----------------------|
| 7   | GRM8  | intron   | rs13247338 | 12,6090,509 | T               | C  | 0.155             | -0.069              | $2.90 \times 10^{-2}$ |
| 7   | GRM8  | intron   | rs2299456  | 126,168,766 | C               | T  | 0.164             | -0.064              | $3.10 \times 10^{-2}$ |
| 7   | GRM8  | intron   | rs11767915 | 126,288,566 | C               | T  | 0.148             | -0.067              | $4.00 \times 10^{-2}$ |
| 7   | GRM8  | intron   | rs4731334  | 126,514,557 | C               | T  | 0.100             | -0.112              | $2.30 \times 10^{-3}$ |
| 7   | GRM8  | intron   | rs978874   | 126,664,152 | T               | C  | 0.691             | 0.056               | $1.80 \times 10^{-2}$ |
| 7   | GRM8  | intron   | rs2237785  | 126,717,992 | A               | C  | 0.607             | 0.044               | $4.80 \times 10^{-2}$ |
| 7   | CHRM2 | intron   | rs10954565 | 136,560,248 | G               | A  | 0.776             | 0.071               | $7.90 \times 10^{-3}$ |
| 7   | CHRM2 | intron   | rs4475425  | 136,575,199 | A               | G  | 0.233             | 0.054               | $4.10 \times 10^{-2}$ |

<sup>a</sup> A1 is the reference allele.

<sup>b</sup> Freq. is the allele frequency of the reference allele A1.

<sup>c</sup> Effect is the effect of the reference allele A1 on the phenotype theta power recorded at Fz.
